# Supplementary material for: Aerobic Spore Formers from the Human Intestine: Genomic and Physiological Characterization of Potential Probiotic Strains
Source: Preprints.org preprint supplement (doi:10.20944/preprints202306.0917.v1), 2023-06-13
Supplement: Supplementary file 1 [file supplementary]

Supplementary Materials

**Table S1.** Hemolytic activity on blood agar plates.

| Strain | Hemolysis | Strain | Hemolysis |
| --- | --- | --- | --- |
| MV2 | α | MV19 | β |
| MV3 | β | MV20 | γ |
| MV4 | γ | MV21 | α |
| MV5 | α | MV22 | α |
| MV6 | γ | MV23 | α |
| MV7 | α | MV24 | γ |
| MV8 | α | MV25 | α |
| MV9 | α | MV26 | γ |
| MV10 | α | MV27 | α |
| MV11 | γ | MV28 | α |
| MV12 | α | MV29 | α |
| MV13 | α | MV30 | γ |
| MV14 | γ | MV31 | α |
| MV15 | γ | MV32 | α |
| MV16 | α | MV33 | α |
| MV17 | γ |  |  |

**Table S2.** Toxin genes present in the genomes of MV4, MV11, MV24 and MV30.

| **Toxin** | **Related genes** | **MV4** | **MV11** | **MV24** | **MV30** | ***B.cereus* ATCC 14579** | ***B.clausii* KSM-K16** | ***B.subtilis* 168** |
| --- | --- | --- | --- | --- | --- | --- | --- | --- |
|
| **Anthrax toxin** | ***cya*** | **-** | **-** | **-** | **-** | **-** | **-** | - |
| *lef* | - | - | - | - | - | - | - |
| *pagA* | - | - | - | - | - | - | - |
| **Anthrolysin O/Cereolysin O/Hemolysin I** | *alo* | - | - | - | - | + | - | - |
| **Cereulide** | *cesA* | - | - | - | - | - | - | - |
| *cesB* | - | - | - | - | - | - | - |
| *cesC* | - | - | - | - | - | - | - |
| *cesD* | - | - | - | - | - | - | - |
| *cesH* | - | - | - | - | - | - | - |
| *cesP* | - | - | - | - | - | - | - |
| *cesT* | - | - | - | - | - | - | - |
| **Certhrax** | *cer* | - | - | - | - | - | - | - |
| **Cytotoxin K (Hemolysin IV)** | *cytK* | - | - | - | - | + | - | - |
| **Hemolysin II** | *hlyII* | - | - | - | - | + | - | - |
| **Hemolysin III** | *hlyIII* | + | + | + | + | + | + | + |
| **Hemolytic enterotoxin HBL** | *hblA* | - | - | - | - | + | - | - |
| *hblC* | - | - | - | - | + | - | - |
| *hblD* | - | - | - | - | + | - | - |
| **Insecticidal crystalline toxins** | *cry* | - | - | - | - | - | - | - |
| *cyt* | - | - | - | - | - | - | - |
| *vip* | - | - | - | - | - | - | - |
| **Non-hemolytic enterotoxin (Nhe)** | *nheA* | - | - | - | - | + | - | - |
| *nheB* | - | - | - | - | + | - | - |
| *nheC* | - | - | - | - | + | - | - |
| **Phytotoxin phaseolotoxin (*Pseudomonas*)** | *cysC1* | + | + | - | + | - | - | - |
| **Cytolysin (*Enterococcus*)** | cylR2 | - | - | - | + | - | - | - |

**Table S3.** List of the most similar known clusters of NRPs found in the genomes of MV4, MV11, MV24, MV30.

|  | **Type** | | | | **Lenght (bp)** | **Most similar known cluster** | **Similarity** | | | |
| --- | --- | --- | --- | --- | --- | --- | --- | --- | --- | --- |
| **MV4** | [transAT-PKS](https://docs.antismash.secondarymetabolites.org/glossary/#transat-pks) | | | | 87,827 | [macrolactin H](https://mibig.secondarymetabolites.org/go/BGC0000181/1) | Polyketide | | | 100% |
| transAT-PKS,T3PKS,NRPS | | | | 100,368 | [bacillaene](https://mibig.secondarymetabolites.org/go/BGC0001089/1) | Polyketide + NRP | | | 100% |
| NRPS,transAT-PKS,betalactone | | | | 107,697 | [fengycin](https://mibig.secondarymetabolites.org/go/BGC0001095/1) | NRP | | | 86% |
| [transAT-PKS](https://docs.antismash.secondarymetabolites.org/glossary/#transat-pks) | | | | 93,789 | [difficidin](https://mibig.secondarymetabolites.org/go/BGC0000176/1) | Polyketide + NRP | | | 100% |
| NRPS,RiPP-like | | | | 50,498 | [bacillibactin](https://mibig.secondarymetabolites.org/go/BGC0000309/1) | NRP | | | 100% |
| [other](https://docs.antismash.secondarymetabolites.org/glossary/#other) | | | | 41,418 | [bacilysin](https://mibig.secondarymetabolites.org/go/BGC0001184/1) | Other | | | 100% |
| [PKS-like](https://docs.antismash.secondarymetabolites.org/glossary/#pks-like) | | | | 41,244 | [butirosin A / butirosin B](https://mibig.secondarymetabolites.org/go/BGC0000693/1) | Saccharide | | | 7% |
| [NRPS](https://docs.antismash.secondarymetabolites.org/glossary/#nrps) | | | | 65,011 | [surfactin](https://mibig.secondarymetabolites.org/go/BGC0000433/1) | NRP:Lipopeptide | | | 82% |
| [NRPS](https://docs.antismash.secondarymetabolites.org/glossary/#nrps) | | | | 92,475 | [fengycin](https://mibig.secondarymetabolites.org/go/BGC0001095/1) | NRP | | | 20% |
| **MV11** | [transAT-PKS](https://docs.antismash.secondarymetabolites.org/glossary/#transat-pks) | | | | 87,827 | macrolactin H | Polyketide | | | 100% |
| transAT-PKS,T3PKS,NRPS | | | | 100,368 | [bacillaene](https://mibig.secondarymetabolites.org/go/BGC0001089/1) | Polyketide + NRP | | | 100% |
| RiPP-like,NRPS | | | | 50,498 | [bacillibactin](https://mibig.secondarymetabolites.org/go/BGC0000309/1) | NRP | | | 100% |
| [other](https://docs.antismash.secondarymetabolites.org/glossary/#other) | | | | 41,418 | [bacilysin](https://mibig.secondarymetabolites.org/go/BGC0001184/1) | Other | | | 100% |
| [transAT-PKS-like](https://docs.antismash.secondarymetabolites.org/glossary/#transat-pks-like) | | | | 65,218 | [difficidin](https://mibig.secondarymetabolites.org/go/BGC0000176/1) | Polyketide + NRP | | | 53% |
| [NRPS](https://docs.antismash.secondarymetabolites.org/glossary/#nrps) | | | | 43,212 | [surfactin](https://mibig.secondarymetabolites.org/go/BGC0000433/1) | NRP:Lipopeptide | | | 39% |
| [transAT-PKS](https://docs.antismash.secondarymetabolites.org/glossary/#transat-pks) | | | | 53,939 | [difficidin](https://mibig.secondarymetabolites.org/go/BGC0000176/1) | Polyketide + NRP | | | 46% |
| [PKS-like](https://docs.antismash.secondarymetabolites.org/glossary/#pks-like) | | | | 41,244 | [butirosin A / butirosin B](https://mibig.secondarymetabolites.org/go/BGC0000693/1) | Saccharide | | | 7% |
| NRPS,transAT-PKS,betalactone | | | | 107,806 | [fengycin](https://mibig.secondarymetabolites.org/go/BGC0001095/1) | NRP | | | 86% |
| [NRPS](https://docs.antismash.secondarymetabolites.org/glossary/#nrps) | | | | 47,196 | [surfactin](https://mibig.secondarymetabolites.org/go/BGC0000433/1) | NRP:Lipopeptide | | | 47% |
| [transAT-PKS-like](https://docs.antismash.secondarymetabolites.org/glossary/#transat-pks-like) | | | | 63,711 | [difficidin](https://mibig.secondarymetabolites.org/go/BGC0000176/1) | Polyketide + NRP | | | 26% |
|  | [NRPS](https://docs.antismash.secondarymetabolites.org/glossary/#nrps) | | | | 95,735 | [fengycin](https://mibig.secondarymetabolites.org/go/BGC0001095/1) | NRP | | | 20% |
| **MV24** | | [NRPS](https://docs.antismash.secondarymetabolites.org/glossary/#nrps) | | 45,583 | | [bacillibactin](https://mibig.secondarymetabolites.org/go/BGC0000309/1) | | NRP | | 100% | |
| [other](https://docs.antismash.secondarymetabolites.org/glossary/#other) | | 41,418 | | [bacilysin](https://mibig.secondarymetabolites.org/go/BGC0001184/1) | | Other | | 100% | |
| [sactipeptide](https://docs.antismash.secondarymetabolites.org/glossary/#sactipeptide) | | 21,611 | | [subtilosin A](https://mibig.secondarymetabolites.org/go/BGC0000602/1) | | RiPP:Thiopeptide | | 100% | |
| NRPS-like,betalactone,NRPS | | 50,754 | | [fengycin](https://mibig.secondarymetabolites.org/go/BGC0001095/1) | | NRP | | 100% | |
| [NRPS](https://docs.antismash.secondarymetabolites.org/glossary/#nrps) | | 54,627 | | [surfactin](https://mibig.secondarymetabolites.org/go/BGC0000433/1) | | NRP:Lipopeptide | | 78% | |
| **MV30** | | | [terpene](https://docs.antismash.secondarymetabolites.org/glossary/#terpene) | 19,989 | | [carotenoid](https://mibig.secondarymetabolites.org/go/BGC0000645/1) | | | Terpene | 50% | | |
| [RiPP-like](https://docs.antismash.secondarymetabolites.org/glossary/#ripp-like) | 11,436 | | [surfactin](https://mibig.secondarymetabolites.org/go/BGC0000433/1) | | | NRP:Lipopeptide | 13% | | |

**Table S4.** Matrix-related proteins putatively encoded by the genomes of MV4, MV11, MV24 and MV30.

| **Protein** | **Protein found in MV4**  **(% identity)** | **Protein found in MV11**  **(% identity)** | **Protein found in MV24**  **(% identity)** | **Protein found in MV30**  **(% identity)** |
| --- | --- | --- | --- | --- |
| **TasA** | MV4_1282 (83.5) | Contig_2_93 (83.5) | MV24_1447 (99.2) | MV30_0609 (37.3) |
| **SipW** | MV4_1283 (70.0) | Contig_2_94 (70.0) | MV24_1446 (100) | MV30_0424 (29.8) |
| **TapA** | MV4_1284 (48.2) | Contig_2_95 (48.2) | MV24_1445 (98.4) | MV30_4765 (37.9) |
| **SinI** | MV4_1280 (71.9) | Contig_2_91 (71.9) | MV24_1449 (100) | MV30_2683 (52.9) |
| **SinR** | MV4_1281 (97.6) | Contig_2_92 (97.6) | MV24_1448 (100) | MV30_2684 (43.2) |
| **Spo0A** | MV4_1243 (97.0) | Contig_2_54 (97.0) | MV24_1487 (100) | MV30_1811 (84.3) |
| **EpsA** | MV4_2261 (65.2) | Contig_3_210 (65.2) | MV24_0888 (98.8) | MV30_0512 (38.5) |
| **EpsB** | MV4_2262 (85.9) | Contig_3_211 (85.9) | MV24_0889 (99.4) | MV30_0513 (59.3) |
| **EpsC** | MV4_2263 (82.6) | Contig_3_212 (82.6) | MV24_0890 (99.8) | MV30_5596 (25.2) |
| **EpsD** | MV4_2264 (74.5) | Contig_3_213 (74.5) | MV24_0891 (99.2) | MV30_0500 (25.4) |
| **EpsE** | MV4_2265 (83.9) | Contig_3_214 (83.9) | MV24_0892 (100) | MV30_0496 (33.0) |
| **EpsF** | MV4_2266 (62.5) | Contig_3_215 (62.5) | MV24_0893 (99.4) | MV30_0500 (27.9) |
| **EpsG** | MV4_2267 (85.9) | Contig_3_216 (85.9) | MV24_0894 (99.0) | MV30_0502 (23.5) |
| **EpsH** | MV4_2268 (70.2) | Contig_3_217 (70.2) | MV24_0895 (98.9) | MV30_0501 (27.6) |
| **EpsI** | MV4_2269 (76.0) | Contig_3_218 (76.0) | MV24_0896 (99.7) | MV30_1501 (21.8) |
| **EpsJ** | MV4_2270 (64.1) | Contig_3_219 (64.1) | MV24_0897 (89.2) | MV30_0501 (36.7) |
| **EpsK** | MV4_2271 (77.2) | Contig_3_220 (77.2) | MV24_0898 (98.2) | MV30_1993 (22.0) |
| **EpsL** | MV4_2272(79.4) | Contig_3_221 (78.7) | MV24_0899 (97.0) | MV30_0495 (42.9) |
| **EpsM** | MV4_2273 (69.2) | Contig_3_222 (69.2) | MV24_0900 (96.6) | MV30_5613 (33.8) |
| **EpsN** | MV4_2274 (73.2) | Contig_3_223 (73.2) | MV24_0901 (97.8) | MV30_5605 (31.3) |
| **EpsO** | MV4_2275 (65.2) | Contig_3_224 (65.2) | MV24_0902 (99.6) | MV30_5942 (28.9) |
| **PurA** | MV4_3474 (97.7) | Contig_4_74 (97.7) | MV24_2773 (99.5) | MV30_4676 (91.1) |
| **PurB** | MV4_3088 (96.9) | Contig_7_55 (96.9) | MV24_1260 (100) | MV30_4850 (84.7) |
| **PurC** | MV4_3087 (88.7) | Contig_7_56 (88.7) | MV24_1259 (97.7) | MV30_4849 (59.9) |
| **PurD** | MV4_3079 (86.1) | Contig_7_64 (86.1) | MV24_1251 (99.7) | MV30_4841 (66.7) |
| **PurE** | MV4_3090 (88.0) | Contig_7_53 (88.0) | MV24_1262 (98.9) | MV30_4852 (73.9) |
| **PurF** | MV4_3083 (98.3) | Contig_7_60 (98.3) | MV24_1255 (100) | MV30_4845 (79.4) |
| **PurH** | MV4_3080 (92.6) | Contig_7_63 (92.6) | MV24_1252 (99.8) | MV30_4842 (73.8) |
| **PurK** | MV4_3089 (83.0) | Contig_7_54 (83.0) | MV24_1261 (98.2) | MV30_4851 (51.6) |
| **PurL** | MV4_3084 (96.0) | Contig_7_59 (96.0) | MV24_1256 (99.4) | MV30_4846 (76.6) |
| **PurM** | MV4_3082 (95.0) | Contig_7_61 (95.0) | MV24_1254 (99.6) | MV30_4844 (73.0) |
| **PurN** | MV4_3081 (84.6) | Contig_7_62 (84.6) | MV24_1253 (99.5) | MV30_4843 (60.8) |
| **PurQ** | MV4_3085 (93.0) | Contig_7_58 (93.4) | MV24_1257 (99.1) | MV30_4847 (73.7) |
| **PurS** | MV4_3086 (100) | Contig_7_57 (100.0) | MV24_1258 (100) | MV30_4848 (92.9) |
